# Supplementary material
Source: Springer Nature journal article supplement (https://www.springermedizin.de/resource/supplementary/13613_2011_91_MOESM5_ESM.pdf/12196118)

Cohort variability analysis

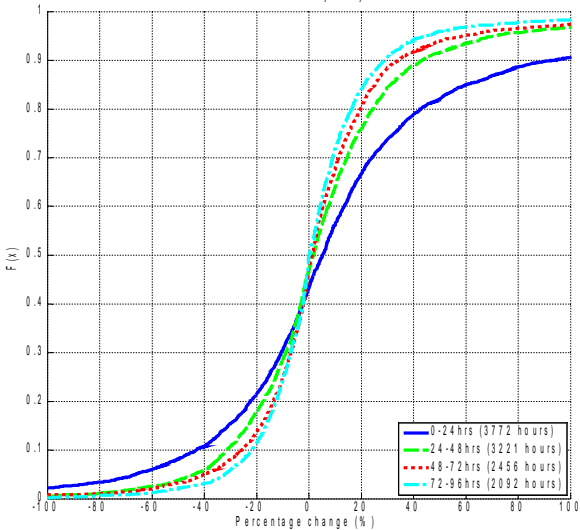

Per-patient variability analysis

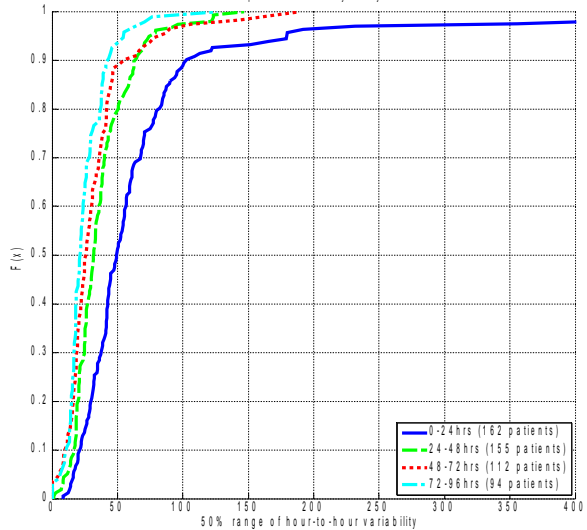

Supplement: MOESM5 [file 12196118]
